# Supplementary material
Source: publisher figshare collection journal article supplement (https://acs.figshare.com/ndownloader/files/24581521)
Supplement: Supplementary file 1 [file 24581521]

## Supporting Information

### Roles of Oxygen Vacancies in the Bulk and Surface of CeO<sub>2</sub> for Toluene Catalytic Combustion

*Ziang Su<sup>a</sup>, Wenhao Yang<sup>a</sup>, Chizhong Wang<sup>a</sup>, Shangchao Xiong<sup>a</sup>, Xingzhong Cao<sup>b</sup>,  
Yue Peng<sup>\*a</sup>, Wenzhe Si<sup>\*a</sup>, Yibin Weng<sup>c</sup>, Ming Xue<sup>c</sup>, and Junhua Li<sup>a</sup>*

<sup>a</sup> State Key Joint Laboratory of Environment Simulation and Pollution Control, School of Environment, Tsinghua University, Beijing 100084, China

<sup>b</sup> Institute of High Energy Physics, Chinese Academy of Sciences, Beijing 100049, China

<sup>c</sup> State Key Laboratory of Petroleum Pollution Control, CNPC Research Institute of Safety and Environmental Technology, Beijing 102206, China

**\*Corresponding author.**

E-mail: pengyue83@tsinghua.edu.cn (Yue Peng)

E-mail: siwenzhe521@126.com (Wenzhe Si)

21

22 Content including: 19 pages, 11 figures, and 1 table

## 1. Experimental Section

### 1.1. Details of Catalyst Synthesis

CeO<sub>2</sub>-S were synthesized via a previously reported method with some modifications.<sup>1</sup> Ce(NO<sub>3</sub>)<sub>3</sub>·6H<sub>2</sub>O (2.5 g) and polyvinyl pyrrolidone (K30, 1 g) were dissolved in ethylene glycol (70 mL) to form a transparent solution. Deionized water (10 mL) was added to the solution and stirred for 30 min. Subsequently, the mixture was transferred into a 100 mL Teflon-lined stainless steel autoclave and kept in an oven at 160 °C for 24 h.

CeO<sub>2</sub>-R and CeO<sub>2</sub>-C were synthesized according to a method reported in the literature.<sup>2</sup> NaOH (19.2 g) and Ce(NO<sub>3</sub>)<sub>3</sub>·6H<sub>2</sub>O (1.736 g) were dissolved in deionized water (70 mL and 10 mL, respectively). The two solutions were mixed under vigorous stirring and stirred for another 30 min. Then, the mixture was transferred into a 100 mL Teflon-lined stainless steel autoclave and kept in an oven at 100 °C and 180 °C for 24 h to obtain CeO<sub>2</sub>-R and CeO<sub>2</sub>-C samples, respectively.

After cooling to room temperature, the products obtained in the above steps were collected by centrifugation and washed with deionized water and ethanol several times. Then the products were dried at 80 °C for 12 h and calcinated at 500 °C for 3 h in static air with the heating rate of 2 °C/min.

### 1.2. Details of Catalyst Characterizations

For Ce M<sub>4,5</sub>-edge EELS spectra, all spectra were corrected by the zero-loss peak, and the background was subtracted using the power-law model. The Fourier-ratio deconvolution was also applied to eliminate the influence of sample thickness. The

white-line ratios of Ce  $M_{4,5}$ -edge were also calculated based on the second derivative method to quantitatively determine the  $Ce^{3+}$  concentration because the  $M_5/M_4$  ratio increases linearly as the proportion of  $Ce^{3+}$  rises.<sup>3, 4</sup> The reference values of  $M_5/M_4$  ratio for pure  $Ce^{3+}$  (1.3) and  $Ce^{4+}$  (0.9) were obtained from the literature.<sup>3, 5</sup>

For Ce  $L_3$ -edge XAS spectra, the radiation was monochromatized by a Si (111) double-crystal monochromator. EXAFS analysis was processed via the Athena software.<sup>6</sup>

For PALS spectra, a 13  $\mu Ci$   $^{22}Na$  positron source was sandwiched between two pieces of sample flakes. Total counts of  $2 \times 10^6$  were acquired for all spectra to ensure accuracy. The obtained spectra were fitted by Lifetime 9.0 software and decomposed into three lifetime components. PALS is an effective technique to investigate the size, location, and relative concentration of oxygen vacancies in  $CeO_2$ -based catalysts.<sup>7</sup> In general, the electron density at the annihilation site has a great influence on the positron lifetime, and the lifetime increases with the decrease of electron density.<sup>8</sup>

For  $O_2$ -TPD experiments, all samples were pretreated under inert gas at 300 °C for 1h. After cooling to 50 °C, the gas flow was changed to 50 mL·min<sup>-1</sup> of 5%  $O_2/He$  and maintained for 1 h. After that, the samples were purged with He flow for 1h and then heated from 50 °C to 1000 °C at the rate of 10°C·min<sup>-1</sup>. For  $H_2$ -TPR experiments, all samples were pretreated under Ar flow at 300 °C for 1h. After cooling to room temperature, the gas flow was changed to 50 mL·min<sup>-1</sup> of 5%  $H_2/Ar$  and maintained for 1 h. After that, the samples were heated to 1000 °C at the rate of 10°C·min<sup>-1</sup>. The

formed water vapor was removed by a cooler. Signals were recorded by a TCD detector.

For Toluene-TPD experiments, all samples were treated in the reaction atmosphere (1000 ppm toluene + 21% O<sub>2</sub> + 79% N<sub>2</sub>, 100 mL·min<sup>-1</sup>) at 50 °C to adsorb toluene. After catalyst adsorption is saturated, the gas flow was changed to 100 mL·min<sup>-1</sup> of N<sub>2</sub>. The samples were firstly purged with N<sub>2</sub> for 1h and then heated from 50 °C to 800 °C at the rate of 10°C·min<sup>-1</sup>. The concentrations of toluene, CO, and CO<sub>2</sub> were recorded by the FTIR detector.

For In-situ DRIFTS, all samples were purged with air at 300 °C for 1 h to remove impurities adsorbed on the surface. After pretreatment, toluene (300 ppm toluene + 21%O<sub>2</sub> + 79% N<sub>2</sub>) was introduced to the reaction cell at 30 °C and maintained for 1 h. Thereafter, the temperature was gradually raised to 250 °C and kept at each sampling temperature for 15 min before the spectra collection.

### 1.3. Details of Catalytic Performance Evaluation and Stability Test

Surface Ce<sup>3+</sup> sites normalized reaction rates ( $r_{\text{Ce}^{3+}}$ , s<sup>-1</sup>) and  $S_{\text{BET}}$  normalized reaction rates ( $r_s$ , mol·m<sup>-2</sup>·s<sup>-1</sup>) were calculated by the following formula

$$r_{\text{Ce}^{3+}} \text{ (s}^{-1}\text{)} = - \frac{C_{\text{inlet}} \cdot F}{m_{\text{cat}} \cdot S_{\text{BET}} \cdot [\text{Ce}_{\text{sur}}^{3+}] \cdot \rho} \cdot \ln(1 - X_{\text{toluene}}) \quad (1)$$

$$r_s \text{ (mol} \cdot \text{m}^{-2} \cdot \text{s}^{-1}\text{)} = - \frac{C_{\text{inlet}} \cdot F}{m_{\text{cat}} \cdot S_{\text{BET}}} \cdot \ln(1 - X_{\text{toluene}}) \quad (2)$$

where  $C_{\text{inlet}}$  refer to the toluene concentration in the inlet gas,  $F$  (mol·s<sup>-1</sup>) is the flow rate,  $m_{\text{cat}}$  (g) is the mass of catalyst,  $S_{\text{BET}}$  (m<sup>2</sup>·g<sup>-1</sup>) is the specific surface area calculated via BET method,  $[\text{Ce}_{\text{sur}}^{3+}]$  (%) is the surface Ce<sup>3+</sup> proportion derived from

Ce 3d XPS spectra (Figure S1, Table 1),  $\rho$  ( $\text{mol}\cdot\text{m}^{-2}$ ) is the density of surface Ce atoms calculated by  $\text{CeO}_2$  surface models (Figure S2).

The 100 h stability test of  $\text{CeO}_2$ -S was conducted on the same device as catalytic performance evaluation. 100 mg of  $\text{CeO}_2$ -S (40–60 mesh) was treated in the reaction atmosphere (1000 ppm toluene + 21%  $\text{O}_2$  + 79%  $\text{N}_2$ ,  $100\text{ mL}\cdot\text{min}^{-1}$ ), and the temperature was maintained at  $220\text{ }^\circ\text{C}$  for 100 h.

#### 1.4. Details of DFT+U Calculation

First-principles calculations based on density functional theory (DFT) were carried out with the Vienna Ab-initio simulation package (VASP) and PW91 functional.<sup>9, 10</sup> The interaction between core electrons and valence electrons was expressed by the projector-augmented wave (PAW) method.<sup>11</sup> The cutoff energy of the plane-wave basis set was set to 400 eV. To guarantee the accuracy, the convergence criteria of energy and force were set to  $10^{-6}$  eV and  $0.02\text{ eV}\cdot\text{\AA}^{-1}$ , respectively. DFT+U with  $U = 5$  eV was applied to treat Ce 4f orbital.<sup>12, 13</sup>

To simulate  $\text{CeO}_2$  samples, three slab models were constructed with a vacuum region of 15 Å. For  $\text{CeO}_2$ -S with a step-like structure, a  $3 \times 2$  (331) slab model was employed.<sup>12</sup> For  $\text{CeO}_2$ -R, a  $3 \times 3$  (110) slab model was used. For  $\text{CeO}_2$ -C, a  $3 \times 3$  (100) slab model was built, and half of the top oxygen atoms were moved to the bottom for simulation of surface reconstruction.<sup>13, 14</sup> Before calculation, no more than half of the atomic layers from the bottom were fixed. The Brillouin zone of (331) model was sampled using a Monkhorst–Pack k-point set of  $2 \times 1 \times 1$ , whereas those of other two models were sampled by a  $2 \times 2 \times 1$  k-point set to acquire similar sampling densities.



## 2. Supporting Figures

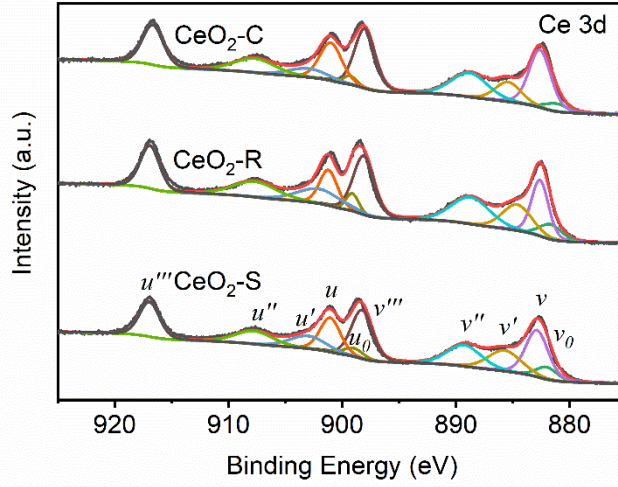

**Figure S1.** Ce 3d XPS spectra of CeO<sub>2</sub> samples.

All spectra were deconvoluted into ten components. Specifically, the peaks of 3d<sub>5/2</sub> include  $v_0$ ,  $v$ ,  $v'$ ,  $v''$ , and  $v'''$ , and the peaks of 3d<sub>3/2</sub> consist of  $u_0$ ,  $u$ ,  $u'$ ,  $u''$ , and  $u'''$ .<sup>15, 16</sup> Among the components, the spin-orbit split doublets including  $v$ ,  $v''$ ,  $v'''$ ,  $u$ ,  $u''$ , and  $u'''$  arise from the 4f configuration of Ce<sup>4+</sup>, and the other four peaks indicate the presence of Ce<sup>3+</sup>.<sup>17</sup> After the deconvolution, the proportions of surface Ce<sup>3+</sup> ([Ce<sup>3+</sup><sub>sur</sub>]) were calculated by the equation

$$[\text{Ce}_{\text{sur}}^{3+}] = \frac{v_0 + v' + u_0 + u'}{v_0 + v + v' + v'' + v''' + u_0 + u + u' + u'' + u'''} \quad (3)$$

where  $v_0$ ,  $v$ ,  $v'$ ,  $v''$ ,  $v'''$ ,  $u_0$ ,  $u$ ,  $u'$ ,  $u''$ , and  $u'''$  refers to the integrated intensities of corresponding peaks. The [Ce<sup>3+</sup><sub>sur</sub>] values are shown in Table 1.



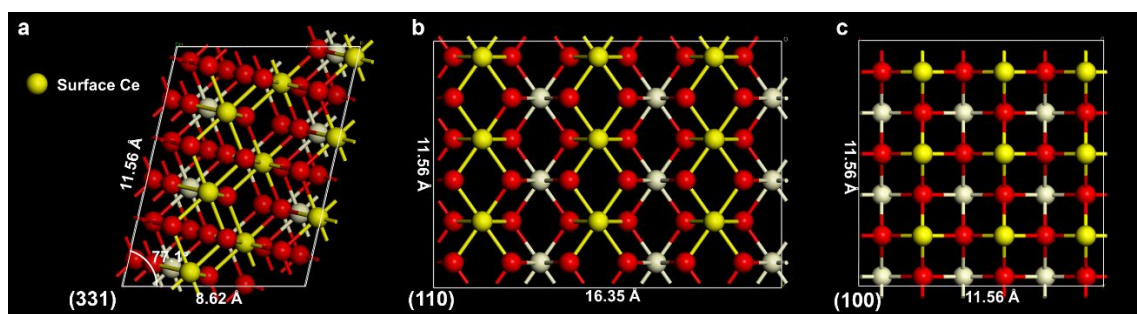

**Figure S2.** Top views of CeO<sub>2</sub> surface structures. (a) (331) plane for CeO<sub>2</sub>-S, (b) (110) plane for CeO<sub>2</sub>-R, (c) (100) plane for CeO<sub>2</sub>-C.

3×3 supercell surface structures of CeO<sub>2</sub> (110) and (100) planes were built to calculate the surface Ce atom concentrations ( $\rho$ , mol·m<sup>-2</sup>) of CeO<sub>2</sub>-R and CeO<sub>2</sub>-C. According to the previously reported literature, (331) plane was chosen for CeO<sub>2</sub>-S to simulate the (111) planes with step-like structures.<sup>12</sup>

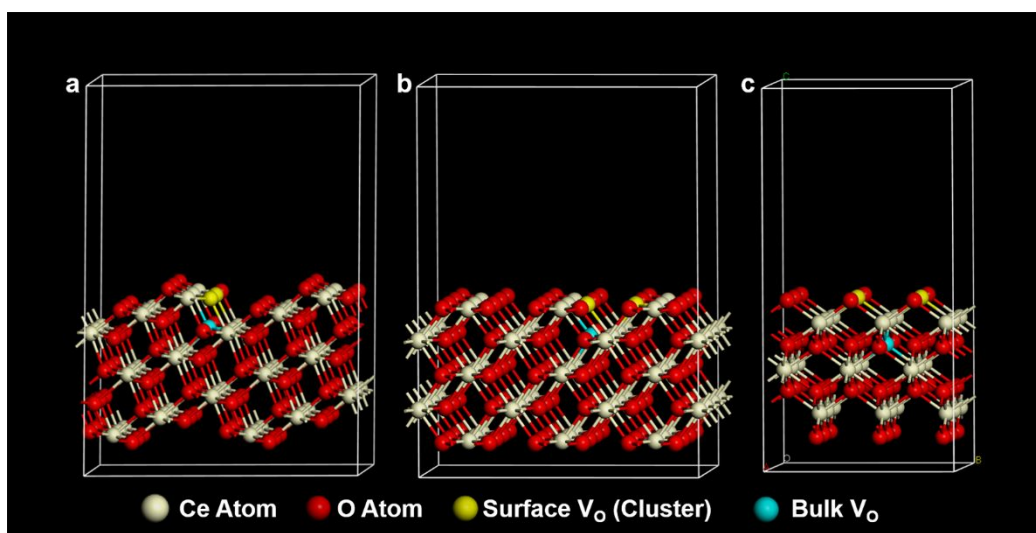

**Figure S3.** CeO<sub>2</sub> slab models for DFT+U calculation. (a) (331) slab model for CeO<sub>2</sub>-S, (b) (110) slab model for CeO<sub>2</sub>-R, (c) (100) slab model for CeO<sub>2</sub>-C. The white, red, yellow, and blue atoms refer to Ce atom, O atom, surface oxygen vacancy (clusters), and bulk oxygen vacancy, respectively.

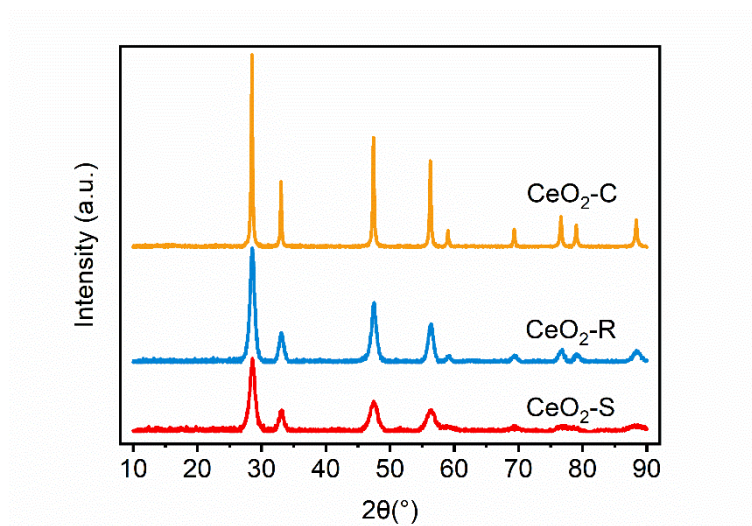

**Figure S4.** XRD patterns of CeO<sub>2</sub> samples.

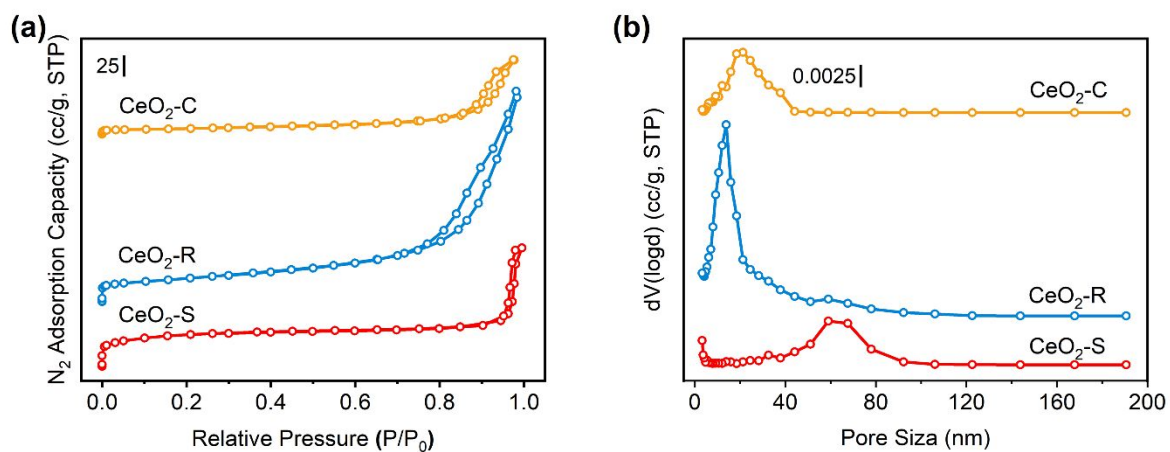

**Figure S5.** (a) N<sub>2</sub> adsorption-desorption isotherms and (b) BJH pore size distributions of nanoceria catalysts.

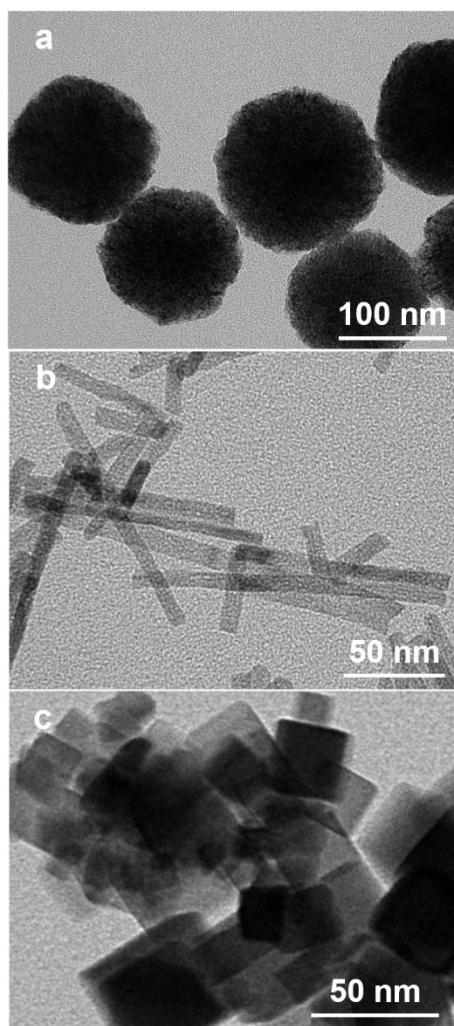

**Figure S6.** Low-magnification TEM images of CeO<sub>2</sub> samples. (a) CeO<sub>2</sub>-S, (b) CeO<sub>2</sub>-R, (c) CeO<sub>2</sub>-C.

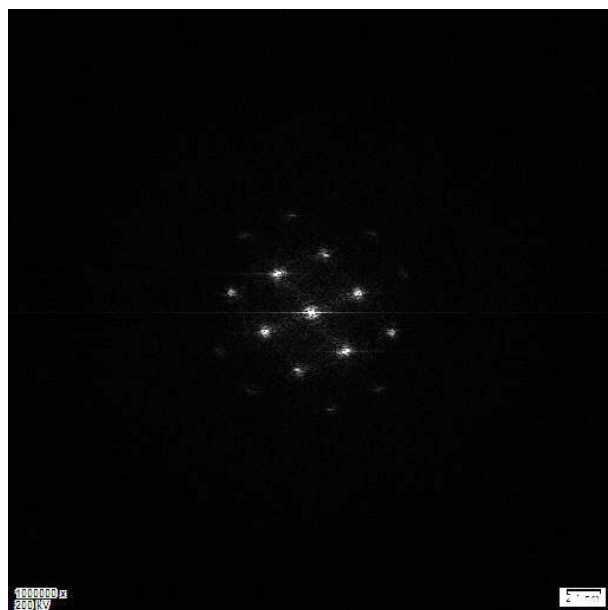

**Figure S7.** SAED images of CeO<sub>2</sub>-S.

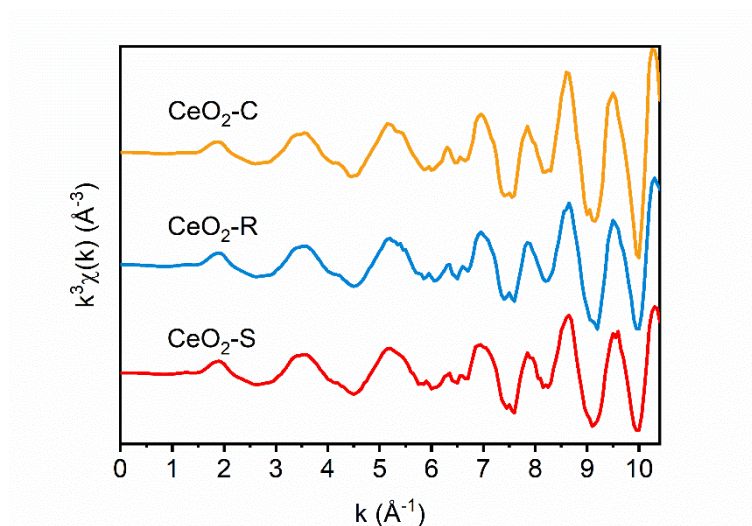

**Figure S8.**  $k^2$ -weighted Ce  $L_3$ -edge EXAFS spectra of CeO<sub>2</sub> samples.

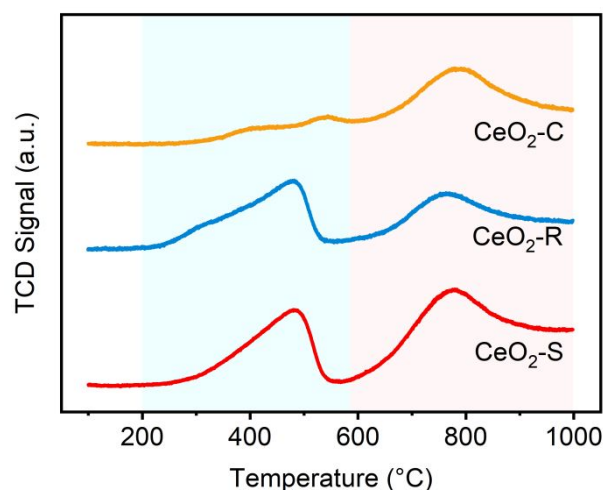

**Figure S9.** H<sub>2</sub>-TPR profile of CeO<sub>2</sub> samples.

The peak at a lower temperature (200–600 °C) is attributed to the reduction of Ce<sup>4+</sup> on the top layers of CeO<sub>2</sub> particle: the main peak at ~ 480 °C arises from the active lattice oxygen, whereas the shoulder peak at ~ 300 °C is due to the adsorbed oxygen species.<sup>18, 19</sup> Consistent with O<sub>2</sub>-TPD, CeO<sub>2</sub>-R exhibits the highest amount of adsorbed oxygen. However, much more lattice oxygen of CeO<sub>2</sub>-S was reduced than CeO<sub>2</sub>-R and CeO<sub>2</sub>-C, endowing this sample with excellent redox property and catalytic combustion activity.



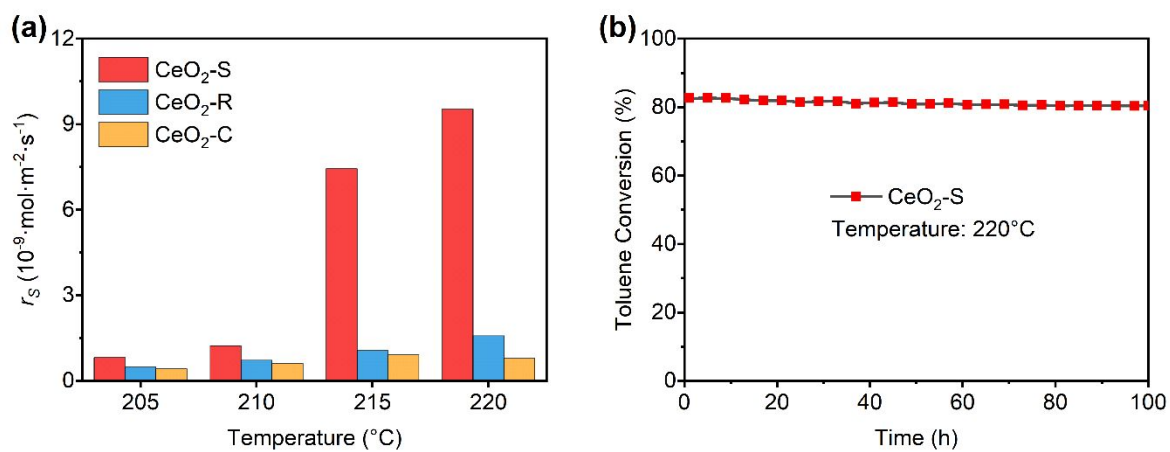

**Figure S10.** (a)  $S_{\text{BET}}$  normalized reaction rates of CeO<sub>2</sub> samples for toluene catalytic combustion, (b) stability test profile of CeO<sub>2</sub>-S.

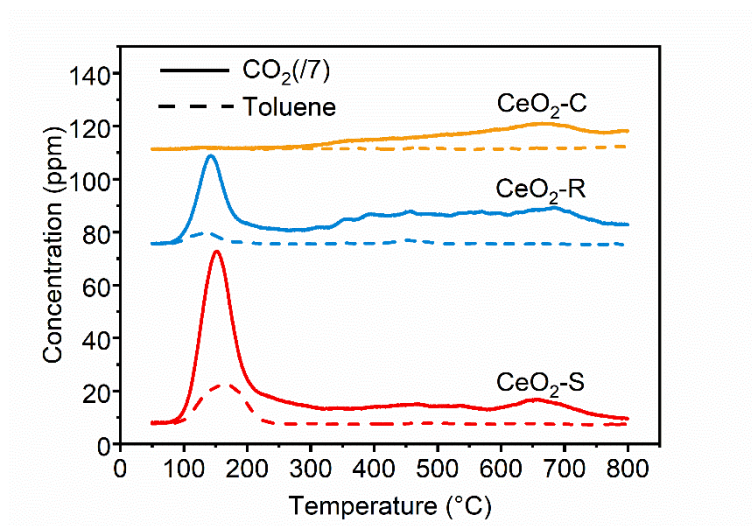

173

174 **Figure S11.** Toluene-TPD profile of CeO<sub>2</sub> samples.

175

### 3. Supporting Table

**Table S1.** Assignment of the in-situ DRIFTS bands for toluene adsorption and catalytic combustion.

| Wavenumber (cm <sup>-1</sup> )  | Vibration                                       | Species                            |
|---------------------------------|-------------------------------------------------|------------------------------------|
| 3000-3500 (br)                  | $\sigma(\text{O-H})$ (Polymerized) <sup>a</sup> | Water <sup>20</sup>                |
| 2966 (s)                        | $\sigma(\text{C-H})$ <sup>a</sup>               | Aromatic ring <sup>21</sup>        |
| 2940 (m), 2860 (s)              | $\sigma(\text{C-H})$ <sup>a</sup>               | Methyl group <sup>22</sup>         |
| 2917 (m), 2820 (m)              | $\sigma(\text{C-H})$ <sup>a</sup>               | Methylene group <sup>22</sup>      |
| 1918 (w)                        | $\sigma(\text{C=O})$ <sup>a</sup>               | Maleic anhydride <sup>23, 24</sup> |
| 1650 (s)                        | $\sigma(\text{C=O})$ <sup>a</sup>               | Aldehyde group <sup>25</sup>       |
| 1635 (w)                        | $\delta(\text{H-O-H})$ <sup>b</sup>             | Water <sup>20</sup>                |
| 1589 (vs), 1530 (vs), 1295 (s)  | $\sigma(-\text{COO}^-)$ <sup>a</sup>            | Carboxylate <sup>c 21, 26</sup>    |
| 1573 (vs), 1525 (vs)            | $\sigma(-\text{COO}^-)$ <sup>a</sup>            | Bidentate carbonate <sup>27</sup>  |
| 1560 (s), 1500 (m)              | $\sigma(\text{C=C})$ <sup>a</sup>               | Aromatic ring <sup>26</sup>        |
| 1430 (vs)                       | $\delta(\text{C-H})$ <sup>b</sup>               | Methylene group <sup>28</sup>      |
| 1380 (s)                        | $\delta(\text{C-H})$ <sup>b</sup>               | Methyl group <sup>28</sup>         |
| 1112 (vs), 1062 (vs), 1040 (vs) | $\sigma(\text{C-O})$ <sup>a</sup>               | Phenolate <sup>29</sup>            |
| 937 (w)                         | $\delta(\text{C=C})$ <sup>b</sup>               | Maleic anhydride <sup>23, 24</sup> |
| 906 (s), 888 (s), 855 (s)       | $\delta(\text{C-H})$ <sup>b</sup>               | Aromatic ring <sup>26</sup>        |

<sup>a</sup>  $\sigma$  refers to stretching vibration.

<sup>b</sup>  $\delta$  refers to bending vibration.

181 ° Carboxylate species refer to benzoate at low temperatures and chain carboxylate  
182 at high temperatures.

183

184

185

186

## References:

1. Liu, W.; Liu, X.; Feng, L.; Guo, J.; Xie, A.; Wang, S.; Zhang, J.; Yang, Y., The synthesis of CeO<sub>2</sub> nanospheres with different hollowness and size induced by copper doping. *Nanoscale* **2014**, *6*, (18), 10693-700.
2. Mai, H. X.; Sun, L. D.; Zhang, Y. W.; Si, R.; Feng, W.; Zhang, H. P.; Liu, H. C.; Yan, C. H., Shape-selective synthesis and oxygen storage behavior of ceria nanopolyhedra, nanorods, and nanocubes. *J. Phys. Chem. B* **2005**, *109*, (51), 24380-24385.
3. Yang, G.; Mobus, G.; Hand, R. J., Cerium and boron chemistry in doped borosilicate glasses examined by EELS. *Micron* **2006**, *37*, (5), 433-441.
4. Spadaro, M. C.; Luches, P.; Bertoni, G.; Grillo, V.; Turner, S.; Van Tendeloo, G.; Valeri, S.; D'Addato, S., Influence of defect distribution on the reducibility of CeO<sub>2-x</sub> nanoparticles. *Nanotechnology* **2016**, *27*, (42).
5. Lavkova, J.; Khalakhan, I.; Chundak, M.; Vorokhta, M.; Potin, V.; Matolin, V.; Matolinova, I., Growth and composition of nanostructured and nanoporous cerium oxide thin films on a graphite foil. *Nanoscale* **2015**, *7*, (9), 4038-4047.
6. Ravel, B.; Newville, M., ATHENA, ARTEMIS, HEPHAESTUS: data analysis for X-ray absorption spectroscopy using IFEFFIT. *J. Synchrotron Radiat.* **2005**, *12*, (4), 537-541.
7. Kong, M.; Li, Y.; Chen, X.; Tian, T.; Fang, P.; Zheng, F.; Zhao, X., Tuning the relative concentration ratio of bulk defects to surface defects in TiO<sub>2</sub> nanocrystals leads to high photocatalytic efficiency. *J. Am. Chem. Soc.* **2011**, *133*, (41), 16414-

209 16417.

210 8. Guan, M.; Xiao, C.; Zhang, J.; Fan, S.; An, R.; Cheng, Q.; Xie, J.; Zhou, M.; Ye,  
 211 B.; Xie, Y., Vacancy associates promoting solar-driven photocatalytic activity of  
 212 ultrathin bismuth oxychloride nanosheets. *J. Am. Chem. Soc.* **2013**, *135*, (28), 10411-7.

213 9. Kresse, G.; Furthmüller, J., Efficiency of ab-initio total energy calculations for  
 214 metals and semiconductors using a plane-wave basis set. *Comp. Mater. Sci.* **1996**, *6*,  
 215 (1), 15-50.

216 10. Perdew, J. P.; Wang, Y., Accurate and simple analytic representation of the  
 217 electron-gas correlation-energy. *Phys. Rev. B* **1992**, *45*, (23), 13244-13249.

218 11. Blochl, P. E., Projector Augmented-Wave Method. *Phys. Rev. B* **1994**, *50*, (24),  
 219 17953-17979.

220 12. Liu, J. C.; Wang, Y. G.; Li, J., Toward rational design of oxide-supported single-  
 221 atom catalysts: Atomic dispersion of gold on ceria. *J. Am. Chem. Soc.* **2017**, *139*, (17),  
 222 6190-6199.

223 13. Wang, J.; Tan, H. Y.; Yu, S. Z.; Zhou, K. B., Morphological effects of gold clusters  
 224 on the reactivity of ceria surface oxygen. *ACS Catal.* **2015**, *5*, (5), 2873-2881.

225 14. Nolan, M., Hybrid density functional theory description of oxygen vacancies in the  
 226 CeO<sub>2</sub> (110) and (100) surfaces. *Chem. Phys. Lett.* **2010**, *499*, (1-3), 126-130.

227 15. Hu, Z.; Liu, X.; Meng, D.; Guo, Y.; Guo, Y.; Lu, G., Effect of ceria crystal plane on  
 228 the physicochemical and catalytic properties of Pd/ceria for CO and propane oxidation.  
 229 *ACS Catal.* **2016**, *6*, (4), 2265-2279.

230 16. Rodriguez, J. A.; Ma, S.; Liu, P.; Hrbek, J.; Evans, J.; Perez, M., Activity of CeO<sub>x</sub>

231 and TiO<sub>x</sub> nanoparticles grown on Au(111) in the water-gas shift reaction. *Science* **2007**,  
 232 *318*, (5857), 1757-1760.

233 17. Yang, F.; Graciani, J.; Evans, J.; Liu, P.; Hrbek, J.; Sanz, J. F.; Rodriguez, J. A.,  
 234 CO oxidation on inverse CeO<sub>x</sub>/Cu(111) catalysts: high catalytic activity and ceria-  
 235 promoted dissociation of O<sub>2</sub>. *J. Am. Chem. Soc.* **2011**, *133*, (10), 3444-51.

236 18. Huang, H.; Dai, Q. G.; Wang, X. Y., Morphology effect of Ru/CeO<sub>2</sub> catalysts for  
 237 the catalytic combustion of chlorobenzene. *Appl. Catal. B-Environ.* **2014**, *158*, 96-105.

238 19. Afzal, S.; Quan, X.; Lu, S., Catalytic performance and an insight into the  
 239 mechanism of CeO<sub>2</sub> nanocrystals with different exposed facets in catalytic ozonation  
 240 of p-nitrophenol. *Appl. Catal. B-Environ.* **2019**, *248*, 526-537.

241 20. Qu, Z.; Bu, Y.; Qin, Y.; Wang, Y.; Fu, Q., The effects of alkali metal on structure of  
 242 manganese oxide supported on SBA-15 for application in the toluene catalytic  
 243 oxidation. *Chem. Eng. J.* **2012**, *209*, 163-169.

244 21. Zhao, S.; Hu, F.; Li, J., Hierarchical core-shell Al<sub>2</sub>O<sub>3</sub>@Pd-CoAlO microspheres for  
 245 low-temperature toluene combustion. *ACS Catal.* **2016**, *6*, (6), 3433-3441.

246 22. Wang, M.; Zhang, F.; Zhu, X.; Qi, Z.; Hong, B.; Ding, J.; Bao, J.; Sun, S.; Gao, C.,  
 247 DRIFTS evidence for facet-dependent adsorption of gaseous toluene on TiO<sub>2</sub> with  
 248 relative photocatalytic properties. *Langmuir* **2015**, *31*, (5), 1730-1736.

249 23. Santos, V. P.; Pereira, M. F. R.; Orfao, J. J. M.; Figueiredo, J. L., The role of lattice  
 250 oxygen on the activity of manganese oxides towards the oxidation of volatile organic  
 251 compounds. *Appl. Catal. B-Environ.* **2010**, *99*, (1-2), 353-363.

252 24. Yang, L.; Zhang, F.; Endo, T.; Hirotsu, T., Microstructure of maleic anhydride

253 grafted polyethylene by high-resolution solution-state NMR and FTIR spectroscopy.  
 254 *Macromolecules* **2003**, *36*, (13), 4709-4718.

255 25. Hou, Z.; Zhou, X.; Lin, T.; Chen, Y.; Lai, X.; Feng, J.; Sun, M., The promotion effect  
 256 of tungsten on monolith Pt/Ce<sub>0.65</sub>Zr<sub>0.35</sub>O<sub>2</sub> catalysts for the catalytic oxidation of toluene.  
 257 *New J. Chem.* **2019**, *43*, (15), 5719-5726.

258 26. Zhao, L.; Zhang, Z.; Li, Y.; Leng, X.; Zhang, T.; Yuan, F.; Niu, X.; Zhu, Y.,  
 259 Synthesis of Ce<sub>a</sub>MnO<sub>x</sub> hollow microsphere with hierarchical structure and its excellent  
 260 catalytic performance for toluene combustion. *Appl. Catal. B-Environ.* **2019**, *245*, 502-  
 261 512.

262 27. Chen, X.; Cai, S.; Yu, E.; Chen, J.; Jia, H., MnO<sub>x</sub>/Cr<sub>2</sub>O<sub>3</sub> composites prepared by  
 263 pyrolysis of Cr-MOF precursors containing in situ assembly of MnO<sub>x</sub> as high stable  
 264 catalyst for toluene oxidation. *Appl. Surf. Sci.* **2019**, *475*, 312-324.

265 28. Busca, G., Infrared studies of the reactive adsorption of organic molecules over  
 266 metal oxides and of the mechanisms of their heterogeneously-catalyzed oxidation.  
 267 *Catal. Today* **1996**, *27*, (3-4), 457-496.

268 29. Rainone, F.; Bulushev, D. A.; Kiwi-Minsker, L.; Renken, A., DRIFTS and transient-  
 269 response study of vanadia/titania catalysts during toluene partial oxidation. *Phys.*  
 270 *Chem. Chem. Phys.* **2003**, *5*, (20), 4445-4449.

271
